# Supplementary material for: The effect of coke deposition on the activity and selectivity of the HZSM-5 zeolite during ethylbenzene alkylation reaction in the presence of ethanol
Source: Royal Society of Chemistry journal article supplement (doi:10.1039/c3cy00925d), 2014-01-01
Supplement: c3cy00925d.pdf [file c3cy00925d.pdf]

**Table S1** Product distribution (Wt %) at various reaction conditions for disproportionation of ethylbenzene over fresh HZ80 catalyst.

| Temp (°C)/<br>time (S) | Conversion<br>(%) | Gases | Benzene | Other<br>(T, X,<br>TMB) | DEB   | EB    |
|------------------------|-------------------|-------|---------|-------------------------|-------|-------|
| 400/20                 | 46.92             | 3.36  | 25.10   | 5.64                    | 12.82 | 53.08 |
| 350/20                 | 42.17             | 1.48  | 20.45   | 3.62                    | 16.62 | 57.83 |
| 15                     | 31.46             | 0.70  | 15.36   | 0.00                    | 15.40 | 68.54 |
| 13                     | 29.61             | 1.37  | 14.34   | 3.20                    | 10.70 | 70.39 |
| 10                     | 22.44             | 0.93  | 11.49   | 1.50                    | 8.51  | 77.56 |
| 7                      | 21.09             | 1.04  | 10.92   | 1.40                    | 7.73  | 78.91 |
| 5                      | 18.14             | 0.79  | 8.75    | 2.43                    | 6.17  | 81.86 |
| 3                      | 12.52             | 0.65  | 6.63    | 0.66                    | 4.58  | 87.48 |
| 300/20                 | 27.53             | 0.29  | 13.04   | 0.77                    | 13.44 | 72.47 |
| 15                     | 24.40             | 0.24  | 11.68   | 1.08                    | 11.39 | 75.60 |
| 13                     | 21.95             | 0.12  | 11.44   | 0.90                    | 9.49  | 78.05 |
| 10                     | 14.74             | 0.08  | 8.28    | 0.13                    | 6.25  | 85.26 |
| 7                      | 10.90             | 0.11  | 5.72    | 0.19                    | 4.88  | 89.10 |
| 5                      | 7.94              | 0.00  | 4.94    | 0.10                    | 2.89  | 92.06 |
| 3                      | 6.46              | 0.07  | 3.61    | 0.16                    | 2.62  | 93.54 |
| 250/20                 | 9.37              | 0.00  | 5.18    | 0.19                    | 4.00  | 90.63 |
| 15                     | 6.27              | 0.00  | 3.54    | 0.12                    | 2.61  | 93.73 |
| 10                     | 4.78              | 0.00  | 2.78    | 0.12                    | 1.88  | 95.22 |
| 5                      | 3.76              | 0.00  | 2.08    | 0.19                    | 1.49  | 96.24 |
| 3                      | 2.83              | 0.00  | 1.91    | 0.14                    | 0.77  | 97.17 |

**Table S2** Product distribution (Wt %) at various reaction conditions for alkylation of ethylbenzene with ethanol over fresh HZ80 catalyst.

| Temp (°C)/<br>time (S) | Conversion<br>(%) | Gases | Benzene | Other<br>(T, X,<br>TMB) | DEB   | EB    | Ethanol |
|------------------------|-------------------|-------|---------|-------------------------|-------|-------|---------|
| Pure Feed              |                   |       |         |                         |       | 83.78 | 16.15   |
| 400/20                 | 52.08             | 15.69 | 19.77   | 12.95                   | 9.13  | 40.15 | 2.32    |
| 15                     | 47.29             | 14.51 | 16.82   | 11.72                   | 9.70  | 44.16 | 3.09    |
| 10                     | 37.79             | 11.72 | 13.08   | 8.27                    | 9.94  | 52.12 | 4.86    |
| 7                      | 31.55             | 10.42 | 12.34   | 7.07                    | 6.38  | 57.34 | 6.44    |
| 5                      | 21.97             | 6.30  | 6.13    | 4.90                    | 9.47  | 65.37 | 7.83    |
| 3                      | 13.96             | 5.56  | 6.21    | 2.55                    | 3.23  | 72.08 | 10.37   |
| 350/20                 | 45.88             | 10.88 | 10.06   | 10.03                   | 21.24 | 45.35 | 2.44    |
| 15                     | 40.15             | 9.49  | 9.48    | 8.17                    | 18.77 | 50.14 | 3.94    |
| 10                     | 33.32             | 7.66  | 6.55    | 6.13                    | 18.48 | 55.86 | 5.32    |
| 5                      | 22.26             | 5.58  | 3.98    | 3.73                    | 13.82 | 65.13 | 7.75    |
| 300/20                 | 42.89             | 7.41  | 5.04    | 6.51                    | 30.61 | 47.84 | 2.59    |
| 15                     | 38.25             | 6.98  | 4.55    | 5.14                    | 28.16 | 51.74 | 3.42    |
| 10                     | 30.99             | 5.66  | 3.42    | 3.97                    | 23.90 | 57.81 | 5.23    |
| 5                      | 18.34             | 3.76  | 1.84    | 1.93                    | 15.49 | 68.42 | 8.55    |
| 250/20                 | 29.19             | 5.34  | 2.10    | 3.78                    | 25.74 | 59.32 | 3.72    |
| 15                     | 23.80             | 6.05  | 1.28    | 2.26                    | 23.04 | 63.84 | 3.54    |
| 10                     | 20.68             | 5.77  | 0.93    | 2.14                    | 19.44 | 66.46 | 5.26    |
| 5                      | 9.60              | 5.58  | 0.45    | 1.26                    | 11.00 | 75.74 | 5.97    |

**Table S3** Product distribution (Wt %) at various reaction conditions for alkylation of ethylbenzene with ethanol over spent HZ80 catalyst.

| Temp (°C)/<br>time (S) | Conversion<br>(%) | Gases | Benzene | Other<br>(T, X,<br>TMB) | DEB   | EB    | Ethanol |
|------------------------|-------------------|-------|---------|-------------------------|-------|-------|---------|
| Pure Feed              |                   |       |         |                         |       | 83.78 | 16.15   |
| 400/20                 | 47.56             | 11.52 | 10.96   | 10.95                   | 20.50 | 43.93 | 2.14    |
| 15                     | 42.37             | 10.02 | 9.41    | 8.49                    | 20.84 | 48.28 | 2.96    |
| 10                     | 35.74             | 7.92  | 6.98    | 6.75                    | 19.94 | 53.84 | 4.56    |
| 7                      | 29.36             | 6.84  | 5.40    | 5.47                    | 16.99 | 59.18 | 6.11    |
| 5                      | 20.50             | 5.49  | 4.01    | 2.05                    | 14.47 | 66.60 | 7.38    |
| 3                      | 16.58             | 4.21  | 2.70    | 2.46                    | 11.58 | 69.89 | 9.16    |
| 350/20                 | 43.59             | 7.20  | 4.88    | 6.91                    | 31.39 | 47.26 | 2.36    |
| 15                     | 41.90             | 6.75  | 4.24    | 5.92                    | 31.37 | 48.68 | 3.04    |
| 10                     | 32.66             | 5.30  | 2.93    | 4.34                    | 26.18 | 56.42 | 4.83    |
| 5                      | 19.14             | 3.81  | 1.72    | 2.34                    | 16.40 | 67.74 | 7.99    |
| 300/20                 | 33.49             | 5.38  | 2.01    | 4.55                    | 29.56 | 55.72 | 2.78    |
| 15                     | 29.24             | 5.02  | 1.62    | 3.35                    | 27.14 | 59.28 | 3.60    |
| 10                     | 21.09             | 4.35  | 0.99    | 2.52                    | 20.36 | 66.11 | 5.67    |
| 5                      | 8.88              | 3.33  | 0.43    | 0.91                    | 8.93  | 76.34 | 10.06   |
| 250/20                 | 13.20             | 8.42  | 0.25    | 2.61                    | 13.23 | 72.72 | 2.77    |
| 15                     | 8.64              | 9.02  | 0.21    | 1.46                    | 9.15  | 76.54 | 3.61    |
| 10                     | 4.59              | 8.29  | 0.15    | 0.99                    | 5.69  | 79.94 | 4.95    |
| 5                      | 5.00              | 8.18  | 0.16    | 0.00                    | 5.69  | 79.59 | 6.49    |
